# Supplementary material
Source: ML conference proceedings conference paper supplement (https://proceedings.neurips.cc/paper_files/paper/2019/hash/8fc983a91396319d8c394084e2d749d7-Abstract.html)
Supplement: Supplementary file [file 8fc983a91396319d8c394084e2d749d7-Supplemental.zip]

## A Supplementary Material

We provide here proofs of all the results from the main text.

### Proof of Theorem 1

*Proof.* We will prove the result by contradiction.

Suppose there is some  $\hat{e} \in E$  such that the optimal solution assigns  $J^+(\hat{e}) > 0$  and  $J^-(\hat{e}) > 0$ . Then we note that

$$a \triangleq \min\{J^+(\hat{e}), J^-(\hat{e})\} > 0.$$

Consider an alternate solution  $(\tilde{J}^+, \tilde{J}^-)$  such that  $\forall e \in E$ ,

$$\begin{aligned} \tilde{J}^+(e) &= \begin{cases} J^+(e) - a & \text{if } e = \hat{e} \\ J^+(e) & \text{if } e \in E \setminus \{\hat{e}\} \end{cases}, \\ \tilde{J}^-(e) &= \begin{cases} J^-(e) - a & \text{if } e = \hat{e} \\ J^-(e) & \text{if } e \in E \setminus \{\hat{e}\} \end{cases}. \end{aligned}$$

Clearly,  $(\tilde{J}^+, \tilde{J}^-)$  is feasible for (1). Moreover, it achieves a lower value of the objective than the optimal solution  $(J^+, J^-)$ . Therefore,  $(J^+, J^-)$  cannot be optimal.  $\square$

### Proof of Theorem 2

*Proof.* We introduce non-negative Lagrangian vectors  $\alpha$  and  $\beta$ , respectively, for the constraints  $Ft \preceq c$  and  $-c \preceq Ft$ . We consider the terms in the objective that depend on  $t$

$$g(t) = t^\top(\rho_1 - \rho_0) + \alpha^\top(Ft - c) - \beta^\top(Ft + c).$$

The gradient  $\nabla g(t)$  must vanish at optimality, so

$$\rho_1^* - \rho_0 + F^\top(\alpha - \beta) = \mathbf{0}.$$

The first part of the theorem follows immediately by defining  $\eta = \beta - \alpha$ . A closer look at (1) reveals that  $\eta = J^- - J^+$  is, in fact, the net flow along the edges  $e^-$  from (1).

Now, we prove the second part. By definition, in order for an edge  $e$  to be active, at least one of  $e^+$  and  $e^-$  must be active, i.e., we must have  $J^+(e) + J^-(e) > 0$ . On the other hand, Theorem 1 implies that at least one of  $J^+(e)$  and  $J^-(e)$  is 0 for each  $e \in E$  in the optimal solution. Combining these facts, we have that for any active edge  $e$ , exactly one of  $e^+$  and  $e^-$  is active, i.e., exactly one of the inequalities  $J^+(e) > 0$  and  $J^-(e) > 0$  must hold. This immediately implies, by complementary slackness, that exactly one of  $\alpha(e)$  or  $\beta(e)$  is 0. Thus, for any active edge  $e$ , either the lower bound or the upper bound on  $Ft^*(e)$  in the constraints  $-c(e) \leq Ft^*(e) \leq c(e)$  must become tight. Therefore, we must have  $Ft^*(e) \in \{\pm c(e)\}$ .  $\square$

### Proof of Theorem 3

*Proof.* Note that since at least one coordinate of  $\epsilon$  is strictly greater than 0, the feasible region is non-empty, and consequently, a unique projection exists. We introduce variables  $\alpha \in \mathbb{R}$  and  $\beta \in \mathbb{R}_+^d$ , and form the Lagrangian

$$L(x, \alpha, \beta) = \frac{1}{2} \|x - y\|^2 - \alpha((x \odot \epsilon)^\top \mathbf{1} - 1) - \beta^\top(x \odot \epsilon).$$

We now write the KKT conditions for the optimal solution  $x$ . For each  $j \in [d]$ , we must have

$$\begin{aligned} x_j - y_j - \alpha \epsilon_j - \beta_j \epsilon_j &= 0 \\ \epsilon_j x_j &\geq 0 \\ \beta_j &\geq 0 \\ \epsilon_j x_j \beta_j &= 0. \end{aligned}$$

Additionally, 
$$\sum_{j=1}^d \epsilon_j x_j = 1.$$

Clearly, for  $j \in [d] \triangleq \{1, 2, \dots, d\}$ ,  $\epsilon_j = 0 \implies x_j = y_j$ . Therefore, without loss of generality we assume in the rest of the proof that  $\epsilon_j > 0$  for all  $j$ . Then we can immediately simplify the KKT conditions to

$$x_j - y_j - \alpha\epsilon_j - \beta_j\epsilon_j = 0 \quad (10)$$

$$x_j \geq 0 \quad (11)$$

$$\beta_j \geq 0 \quad (12)$$

$$x_j\beta_j = 0 \quad (13)$$

$$\sum_{j=1}^d \epsilon_j x_j = 1 \quad (14)$$

We note that  $x_j > 0 \xrightarrow{(13)} \beta_j = 0 \xrightarrow{(10)} y_j + \alpha\epsilon_j > 0 \xrightarrow{\epsilon_j > 0} y_j/\epsilon_j > -\alpha$ , whereas

$$x_j = 0 \xrightarrow{(10)} y_j + \alpha\epsilon_j = -\beta_j\epsilon_j \xrightarrow{\epsilon_j > 0} y_j + \alpha\epsilon_j \leq 0 \xrightarrow{\epsilon_j > 0} y_j/\epsilon_j \leq -\alpha.$$

This shows that the zero coordinates  $x_j$  correspond to smaller values of  $y_j/\epsilon_j$ . Thus, we can sort the indices  $j$  in non-increasing order based on the ratio  $y_j/\epsilon_j$ , reorder  $x$  according to the sorted indices, and find an index  $\ell \in [d]$  such that  $x_j > 0$  for  $j \in [\ell]$  and  $0$  for  $\ell < j \leq d$ . Without loss of generality, we therefore assume that

$$x_1 \geq x_2 \dots \geq x_\ell > 0 = x_{\ell+1} \dots = x_d, \text{ and} \\ y_1/\epsilon_1 \geq y_2/\epsilon_2 \dots \geq y_\ell/\epsilon_\ell > -\alpha > y_{\ell+1}/\epsilon_{\ell+1} \dots = y_d/\epsilon_d. \quad (15)$$

We then have from (14) that

$$1 = \sum_{j=1}^d \epsilon_j x_j = \sum_{j=1}^{\ell} \epsilon_j x_j = \sum_{j=1}^{\ell} \epsilon_j (y_j + \alpha\epsilon_j) \\ \implies \alpha = \frac{1 - \sum_{j=1}^{\ell} \epsilon_j y_j}{\sum_{j=1}^{\ell} \epsilon_j^2}. \quad (16)$$

Thus, our task essentially boils down to finding the number of positive coordinates  $\ell$ . We now show that

$$\ell = \max \left\{ j \in [d] \mid y_j + \epsilon_j \frac{(1 - \sum_{i=1}^j \epsilon_i y_i)}{\sum_{i=1}^j \epsilon_i^2} > 0 \right\}.$$

First consider  $j < \ell$ . Then  $y_j/\epsilon_j > -\alpha$  for  $j \in [\ell]$ . Noting that  $\epsilon_j > 0$  for all  $j$  and using (16), we must have

$$y_j + \epsilon_j \frac{(1 - \sum_{i=1}^j \epsilon_i y_i)}{\sum_{i=1}^j \epsilon_i^2} \\ = \frac{\epsilon_j}{\sum_{i=1}^j \epsilon_i^2} \left( y_j \frac{\sum_{i=1}^j \epsilon_i^2}{\epsilon_j} + 1 - \sum_{i=1}^j \epsilon_i y_i \right)$$

which has the same sign as

$$y_j \frac{\sum_{i=1}^j \epsilon_i^2}{\epsilon_j} + 1 - \sum_{i=1}^j \epsilon_i y_i \\ = y_j \frac{\sum_{i=1}^j \epsilon_i^2}{\epsilon_j} + \sum_{i=j+1}^{\ell} \epsilon_i y_i + 1 - \sum_{i=1}^{\ell} \epsilon_i y_i \\ = y_j \frac{\sum_{i=1}^j \epsilon_i^2}{\epsilon_j} + \sum_{i=j+1}^{\ell} \epsilon_i y_i + \alpha \sum_{i=1}^{\ell} \epsilon_i^2 \\ = \left( \frac{y_j}{\epsilon_j} + \alpha \right) \sum_{i=1}^j \epsilon_i^2 + \sum_{i=j+1}^{\ell} \epsilon_i^2 \left( \frac{y_i}{\epsilon_i} + \alpha \right) \\ > 0.$$

Now consider  $j = \ell$ . Since  $y_\ell/\epsilon_\ell > -\alpha$  and  $\epsilon_\ell > 0$ , we have  $y_\ell + \alpha\epsilon_\ell > 0$ . Thus

$$\begin{aligned} y_j + \epsilon_j \frac{(1 - \sum_{i=1}^j \epsilon_i y_i)}{\sum_{i=1}^j \epsilon_i^2} &= y_\ell + \epsilon_\ell \frac{(1 - \sum_{i=1}^\ell \epsilon_i y_i)}{\sum_{i=1}^\ell \epsilon_i^2} \\ &= y_\ell + \alpha\epsilon_\ell > 0. \end{aligned}$$

Finally, we consider  $\ell < j \leq d$ . We note that

$$\begin{aligned} &y_j + \epsilon_j \frac{(1 - \sum_{i=1}^j \epsilon_i y_i)}{\sum_{i=1}^j \epsilon_i^2} \\ &= \frac{\epsilon_j}{\sum_{i=1}^j \epsilon_i^2} \left( y_j \frac{\sum_{i=1}^j \epsilon_i^2}{\epsilon_j} + 1 - \sum_{i=1}^j \epsilon_i y_i \right), \end{aligned}$$

which has the same sign as

$$\begin{aligned} &y_j \frac{\sum_{i=1}^j \epsilon_i^2}{\epsilon_j} + 1 - \sum_{i=1}^j \epsilon_i y_i \\ &= y_j \frac{\sum_{i=1}^j \epsilon_i^2}{\epsilon_j} + 1 - \sum_{i=1}^\ell \epsilon_i y_i - \sum_{i=\ell+1}^j \epsilon_i y_i \\ &= y_j \frac{\sum_{i=1}^j \epsilon_i^2}{\epsilon_j} + \alpha \sum_{i=1}^\ell \epsilon_i^2 - \sum_{i=\ell+1}^j \epsilon_i y_i \\ &= \left( \frac{y_j}{\epsilon_j} + \alpha \right) \sum_{i=1}^\ell \epsilon_i^2 + \sum_{i=\ell+1}^j \epsilon_i^2 \left( \frac{y_j}{\epsilon_j} - \frac{y_i}{\epsilon_i} \right), \\ &\leq 0, \end{aligned}$$

by leveraging the sorted property in (15) and the fact that  $y_j/\epsilon_j \leq -\alpha$  for  $j \in [\ell]$ .

Therefore, we have shown that  $y_j + \epsilon_j \frac{(1 - \sum_{i=1}^j \epsilon_i y_i)}{\sum_{i=1}^j \epsilon_i^2} > 0$  for all  $j \in [\ell]$ , and at most 0 for  $\ell < j \leq d$ . Algorithm 1 implements this procedure, and that proves its correctness. The  $O(d \log d)$  time complexity is due to the cost of sorting the indices  $j \in [d]$  based on  $y_j/\epsilon_j$ .  $\square$

#### Proof of Theorem 4

*Proof.* Recall the formulation (6):

$$\min_{\substack{\epsilon \in \mathcal{E}_k \\ \tilde{\rho}_1 \odot \epsilon \in \Delta(V)}} \max_{t \in \mathcal{T}_{F,c}} \underbrace{t^\top (\tilde{\rho}_1 \odot \epsilon - \rho_0)}_{\phi(\epsilon, t, \tilde{\rho}_1)} + \frac{\lambda}{2} \|\tilde{\rho}_1\|^2.$$

Making the constraints  $\mathcal{E}_k$  explicit, we get

$$\min_{\substack{\epsilon \in \{0,1\}^{|V|} \\ \epsilon^\top \mathbf{1} \leq k}} \left( \min_{\substack{\tilde{\rho}_1 \in \mathbb{R}^{|V|} \\ \tilde{\rho}_1 \odot \epsilon \in \Delta(V)}} \max_{t \in \mathcal{T}_{F,c}} \phi(\epsilon, t, \tilde{\rho}_1) \right). \quad (17)$$

Note that for any fixed  $\epsilon$  (a)  $\{\tilde{\rho}_1 \in \mathbb{R}^{|V|} \mid (\tilde{\rho}_1 \odot \epsilon) \in \Delta(V)\}$  is convex, and  $\mathcal{T}_{F,c}$  is convex and compact, (b)  $\phi(\epsilon, t, \tilde{\rho}_1)$  is continuous, and (c) for every fixed  $t$ ,  $\phi(\epsilon, t, \cdot)$  is convex in  $\tilde{\rho}_1$ ; while for every fixed  $\tilde{\rho}_1$ ,  $\phi(\epsilon, \cdot, \tilde{\rho}_1)$  is linear (thus concave) in  $t$ . Therefore, invoking the Sion's minimax theorem [60], we can swap the order of min and max within the parentheses in (17), and obtain

$$\min_{\substack{\epsilon \in \{0,1\}^{|V|} \\ \epsilon^\top \mathbf{1} \leq k}} \left( \max_{t \in \mathcal{T}_{F,c}} \min_{\substack{\tilde{\rho}_1 \in \mathbb{R}^{|V|} \\ \tilde{\rho}_1 \odot \epsilon \in \Delta(V)}} \phi(\epsilon, t, \tilde{\rho}_1) \right). \quad (18)$$

We introduce Lagrangian variables  $\nu \in \mathbb{R}_+^{|V|}$  and  $\zeta \in \mathbb{R}$ , respectively, for the simplex constraints (a)  $\mathbf{0} \preceq \tilde{\rho}_1 \odot \epsilon$  and (b)  $(\tilde{\rho}_1 \odot \epsilon)^\top \mathbf{1} = 1$  to get

$$\Phi(\epsilon, t, \tilde{\rho}_1, \nu, \zeta) \triangleq \phi(\epsilon, t, \tilde{\rho}_1) + \zeta((\tilde{\rho}_1 \odot \epsilon)^\top \mathbf{1} - 1) - \nu^\top (\tilde{\rho}_1 \odot \epsilon) . \quad (19)$$

Applying the optimality conditions, we note for any fixed pair  $(\epsilon, t)$ , the corresponding optimal  $\tilde{\rho}_1$  must satisfy

$$\partial_{\tilde{\rho}_1} \Phi(\epsilon, t, \tilde{\rho}_1, \nu, \zeta) = 0 ,$$

whereby

$$\tilde{\rho}_1 = - \left( \frac{(t - \nu) \odot \epsilon + \zeta \epsilon}{\lambda} \right) . \quad (20)$$

Plugging in  $\tilde{\rho}_1$  from (20) into (19), we thus have the following equivalent dual formulation for (18)

$$\min_{\substack{\epsilon \in \{0,1\}^{|V|} \\ \epsilon^\top \mathbf{1} \leq k}} \max_{t \in \mathcal{T}_{F,c}} \max_{\nu \in \mathbb{R}_+^{|V|}, \zeta \in \mathbb{R}} \mathcal{M}(\epsilon, t, \nu, \zeta) ,$$

where

$$\mathcal{M}(\epsilon, t, \nu, \zeta) = \frac{-1}{2\lambda} \|(t - \nu + \zeta \mathbf{1}) \odot \epsilon\|^2 - t^\top \rho_0 - \zeta . \quad (21)$$

Invoking the first order convex optimality condition for constrained optimization, the  $\hat{\epsilon}$  obtained from relaxation of (6) is optimal if and only if

$$\mathbf{0} \in \left\{ \underbrace{\partial_\epsilon \max_{t \in \mathcal{T}_{F,c}} \max_{\nu \in \mathbb{R}_+^{|V|}, \zeta \in \mathbb{R}} \mathcal{M}(\epsilon, t, \nu, \zeta)}_{(A)} + \mathbb{N} \right\} , \quad (22)$$

where  $\mathbb{N}$  is the normal cone of the relaxed constraints

$$\tilde{\mathcal{E}}_k = \left\{ \epsilon \in [0, 1]^{|V|} \mid \epsilon^\top \mathbf{1} \leq k \right\} .$$

Now we note that for any vector  $x$ , we can write  $x \odot \epsilon = D(\epsilon)x$ , where  $D(\epsilon)$  is the diagonal matrix corresponding to  $\epsilon$ . Also, since  $\epsilon \in \{0, 1\}^{|V|}$ , we get  $D(\epsilon)^\top D(\epsilon) = D(\epsilon)$ . Thus, for any  $x$ , we have

$$\|x \odot \epsilon\|^2 = \|D(\epsilon)x\|^2 = (D(\epsilon)x)^\top D(\epsilon)x = x^\top D(\epsilon)^\top D(\epsilon)x = x^\top D(\epsilon)x .$$

In particular, we can simplify  $\|(t - \nu + \zeta \mathbf{1}) \odot \epsilon\|^2$  in (21) when we set  $x$  to  $t - \nu + \zeta \mathbf{1}$ . The theorem statement then follows immediately from (22) by representing  $\mathbb{N}$  at the integral point  $\epsilon^*$  and leveraging the non-negative dual parameter associated with the constraint  $\epsilon^\top \mathbf{1} \leq k$ .  $\square$

### Proof of Theorem 5

*Proof.* We will use the shorthand  $\tilde{\rho}_{1v}$  for  $\tilde{\rho}_1(v)$ , and likewise for indexing  $t, \nu$ , and  $\epsilon$ . Using (20),

$$\tilde{\rho}_1 = - \left( \frac{(t - \nu) \odot \epsilon + \zeta \epsilon}{\lambda} \right) = - \left( \frac{t - \nu + \zeta \mathbf{1}}{\lambda} \right) \odot \epsilon .$$

Therefore,

$$\tilde{\rho}_1 \odot \epsilon = - \left( \frac{t - \nu + \zeta \mathbf{1}}{\lambda} \right) \odot \epsilon \odot \epsilon = - \left( \frac{t - \nu + \zeta \mathbf{1}}{\lambda} \right) \odot \epsilon = \tilde{\rho}_1 , \quad (23)$$

since  $\epsilon \in \{0, 1\}^{|V|}$ . We write one of the KKT conditions for optimality

$$\tilde{\rho}_1 \odot \epsilon \odot \nu = \tilde{\rho}_1 \odot \nu = \mathbf{0} .$$

We consider the different cases. Note that for  $v \in V$ , using (23), we have

$$\tilde{\rho}_{1v} > 0 \implies \nu_v = 0 \implies \tilde{\rho}_{1v} = - \frac{(t_v + \zeta)\epsilon_v}{\lambda} , \quad (24)$$

and

$$\tilde{\rho}_{1v} = 0 \implies (t_v - \nu_v + \zeta)\epsilon_v = 0 \implies \nu_v \epsilon_v = (t_v + \zeta)\epsilon_v. \quad (25)$$

But since  $\nu_v \geq 0$ , and  $\epsilon_v \in \{0, 1\}$ , we note that  $\nu_v \epsilon_v \geq 0$ . Then, by (25), we have

$$\nu_v \epsilon_v \geq 0 \implies -\frac{(t_v + \zeta)\epsilon_v}{\lambda} \leq 0 = \tilde{\rho}_{1v}. \quad (26)$$

Combining (24) and (26), we can write

$$\tilde{\rho}_{1v} = \max \left\{ -\frac{(t_v + \zeta)\epsilon_v}{\lambda}, 0 \right\} = \frac{\epsilon_v}{\lambda} \max \{ -(t_v + \zeta), 0 \}, \quad (27)$$

since  $\epsilon_v \geq 0$  for all  $v \in V$  and  $\lambda > 0$ . Therefore, we get  $\tilde{\rho}_1 = \frac{\epsilon}{\lambda} \odot r_+$ , where  $r = -(t + \zeta \mathbf{1})$ , and  $r_+$  is computed by setting the negative coordinates of  $r$  to 0.

Moreover, since  $\tilde{\rho}_1 \odot \nu = \mathbf{0}$ , we can eliminate  $\nu$  from (19) and write (17) as

$$\min_{\epsilon \in \mathcal{E}_k} \max_{t \in \mathcal{T}_{F,c}} \max_{\zeta \in \mathbb{R}} t^\top (\tilde{\rho}_1 - \rho_0) + \frac{\lambda}{2} \|\tilde{\rho}_1\|^2 + \zeta (\tilde{\rho}_1^\top \mathbf{1} - 1)$$

Substituting for  $\tilde{\rho}_1$  from (27), we obtain the following equivalent problem

$$\begin{aligned} \min_{\epsilon \in \mathcal{E}_k} \max_{t \in \mathcal{T}_{F,c}} \max_{\zeta \in \mathbb{R}} & -\frac{r^\top}{\lambda} (\epsilon \odot r_+) + \frac{1}{2\lambda} r_+^\top (\epsilon \odot r_+) - t^\top \rho_0 - \zeta, \\ & = \min_{\epsilon \in \mathcal{E}_k} \max_{t \in \mathcal{T}_{F,c}} \max_{\zeta \in \mathbb{R}} \frac{-1}{2\lambda} \epsilon^\top (r_+ \odot (2r - r_+)) - t^\top \rho_0 - \zeta, \end{aligned}$$

which can be written as

$$\begin{aligned} & \min_{\epsilon \in \mathcal{E}_k} \max_{t \in \mathcal{T}_{F,c}} \max_{\zeta \in \mathbb{R}} -\frac{1}{2\lambda} \sum_{v:r_v \geq 0} \epsilon_v r_v^2 - t^\top \rho_0 - \zeta \\ = & \min_{\epsilon \in \mathcal{E}_k} \max_{t \in \mathcal{T}_{F,c}} \max_{\zeta \in \mathbb{R}} -\frac{1}{2\lambda} \sum_{v:t_v \leq -\zeta} \epsilon_v r_v^2 - t^\top \rho_0 - \zeta \\ = & \min_{\epsilon \in \mathcal{E}_k} \max_{t \in \mathcal{T}_{F,c}} \max_{\zeta \in \mathbb{R}} -\frac{1}{2\lambda} \sum_{v:t_v \leq -\zeta} \epsilon_v (t_v + \zeta)^2 - t^\top \rho_0 - \zeta \\ = & \min_{\epsilon \in \mathcal{E}_k} \max_{t \in \mathcal{T}_{F,c}} \max_{\zeta \in \mathbb{R}} -\frac{1}{2\lambda} \sum_{v:t_v \leq -\zeta} (\epsilon_v (t_v + \zeta)^2 + 2\lambda t_v \rho_{0,v}) - \sum_{v:t_v > -\zeta} t_v \rho_{0,v} - \zeta. \end{aligned}$$

□
